# Supplementary material for: Printing nanoparticle-based isotropic/anisotropic networks for directional electrical circuits
Source: Royal Society of Chemistry journal article supplement (doi:10.1039/d2nr03892g), 2022-01-01
Supplement: d2nr03892g1.pdf [file d2nr03892g1.pdf]

**Supporting Information**

**Printing nanoparticle-based isotropic/anisotropic networks for directional  
electrical circuits**

*Sisi Chen, Qi Pan\*, Tingqing Wu, Hongfei Xie, Tangyue Xue, Meng Su\* and Yanlin  
Song\**

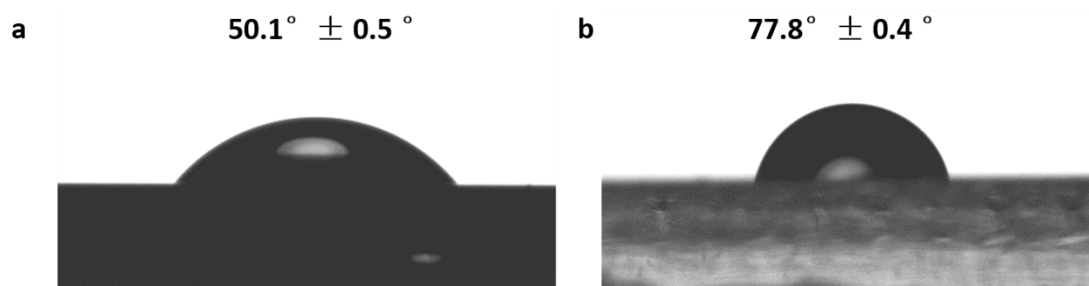

**Fig. S1** Contact angles of water at the substrate (a) and the template (b).

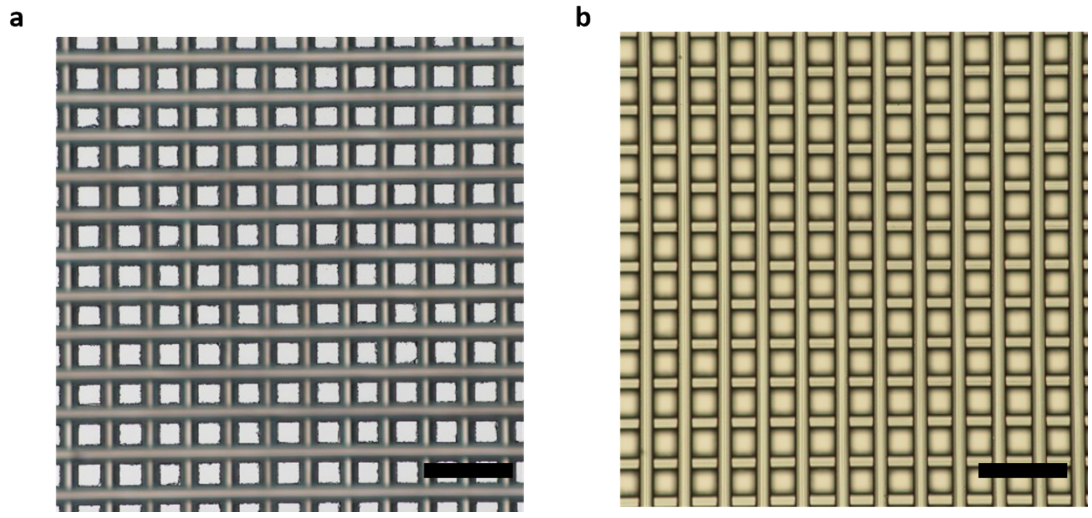

**Fig. S2** Optical images of (a) groove-shaped silicon wafer and (b) grid-shaped template.

Scale bar: 100  $\mu\text{m}$ .

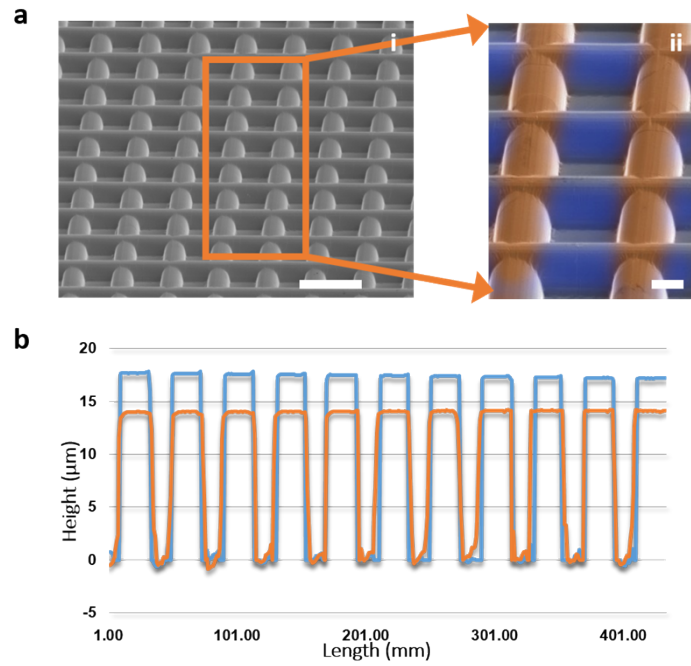

**Fig. S3** Characterization of the grid-shaped template. (a) SEM images of the grid-shaped template and (ii) magnified SEM images of the template in (i). Scale bars: i: 50  $\mu\text{m}$ , ii: 10  $\mu\text{m}$ . (b) The statistical height chart of transverse and longitudinal walls.

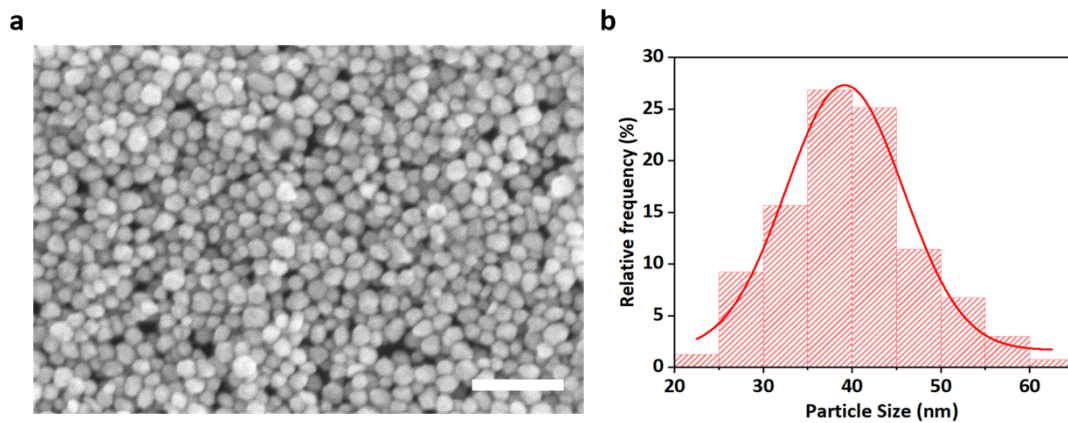

**Fig. S4** Characterization of the Ag NPs. (a) SEM image, scale bar: 200  $\mu\text{m}$ . (b) Particle size distribution of the synthesized Ag NPs used in this work.

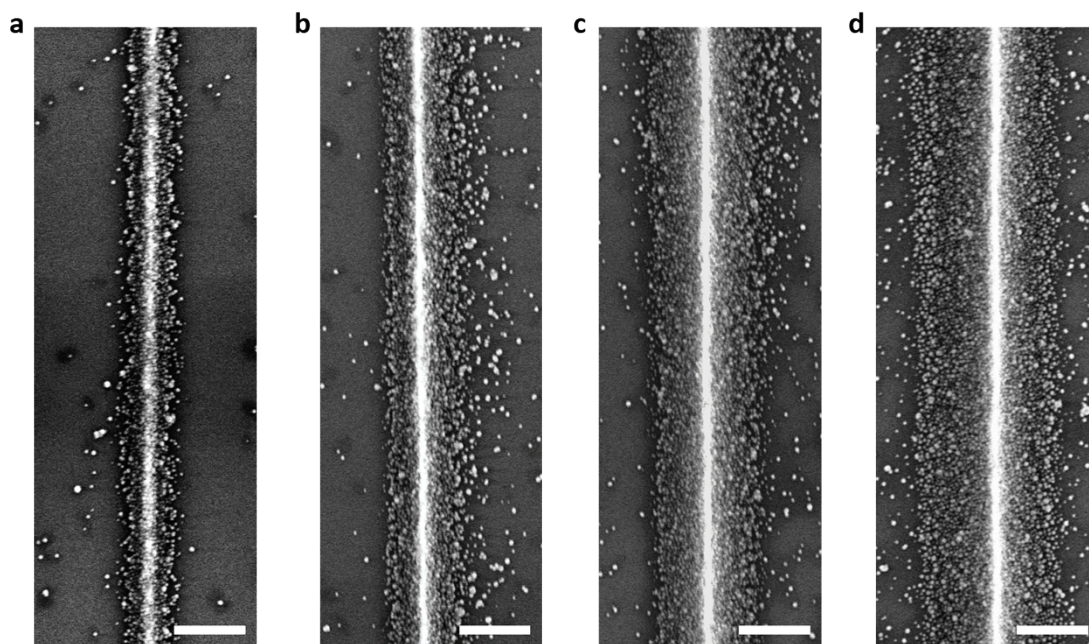

**Fig. S5** The thickness of the printed micro/nano lines can be controlled by the concentration of Ag NPs. In this work, the width of printed lines can be manipulated from 650 nm to 2  $\mu\text{m}$  under the concentration of 5–60  $\text{mg mL}^{-1}$ . Scale bar: 1  $\mu\text{m}$ .

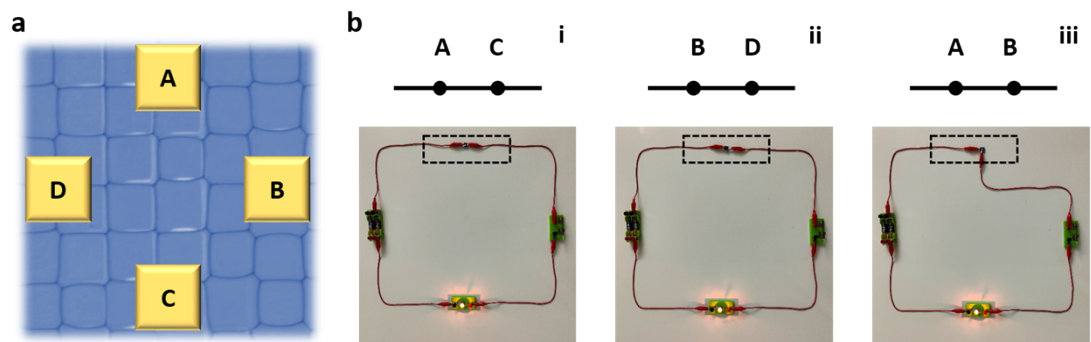

**Fig. S6 (a)** Tested CC and the four evaporated electrodes A-D. **(b)** Application of networks in LED circuits. The circuits exhibit conducting states when they are accessed to different electrodes of CC.

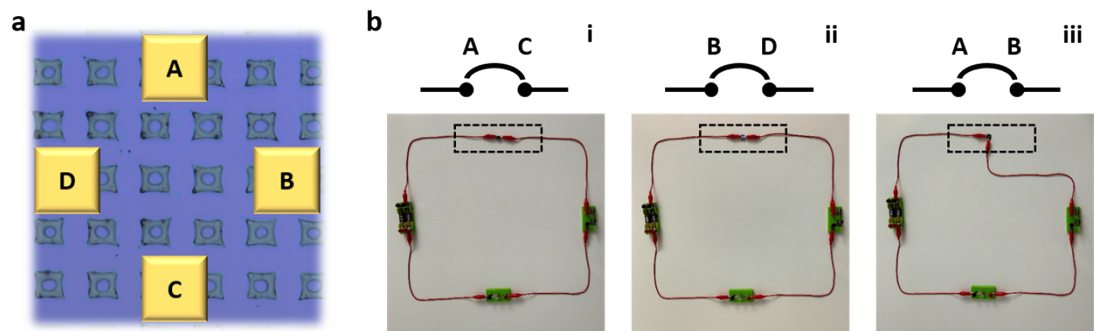

**Fig. S7 (a)** Tested DC and the four evaporated electrodes A-D. **(b)** Application of networks in LED circuits. The circuits exhibit non-conducting states when they are accessed to different electrodes of DC.
